# Supplementary material for: Identification of Potential Core Genes Associated With the Progression of Stomach Adenocarcinoma Using Bioinformatic Analysis
Source: Frontiers journal article supplement (doi:10.3389/fgene.2020.517362), 2020-10-22
Supplement: Data_Sheet_1.PDF [file Data_Sheet_1.PDF]

**Supplementary Table 1.** Information of 10 core DEGs

| Gene.symbol | group | adj.P.Val | log2FC <sub>A</sub> |
|-------------|-------|-----------|---------------------|
| COL1A1      | up    | 0.00501   | 2.66870             |
| FN1         | up    | 0.01844   | 1.48275             |
| COL5A2      | up    | 0.00034   | 1.70204             |
| CDH11       | up    | 0.00204   | 2.00854             |
| BGN         | up    | 0.00073   | 2.17694             |
| SERPINH1    | up    | 0.00025   | 2.55090             |
| THBS2       | up    | 0.00106   | 3.22939             |
| COL6A3      | up    | 0.00020   | 2.21399             |
| COL1A2      | up    | 0.00015   | 2.11779             |
| COL12A1     | up    | 0.00080   | 2.10952             |

**Supplementary Table 2** Gene Ontology enrichment and KEGG pathway analysis of the differentially expressed genes.

**A**

| Term                                              | Adjusted P-value | Combined Score | Genes                                                                                           |
|---------------------------------------------------|------------------|----------------|-------------------------------------------------------------------------------------------------|
| extracellular matrix organization (GO:0030198)    | 1.65E-08         | 306.7507065    | COL12A1;FN1;BGN;NID2;COL1A1;BMP1;COL1A2;ADAM12;COL5A2;MFAP2;SERPINH1;SPP1;COL8A1;COL10A1;COL6A3 |
| collagen fibril organization (GO:0030199)         | 0.001431976      | 439.2168738    | COL1A1;COL1A2;COL12A1;COL5A2;SERPINH1                                                           |
| skeletal system development (GO:0001501)          | 0.003033852      | 128.3733184    | COL1A1;BMP1;COL1A2;HYAL1;COL12A1;CDH11;COL10A1;SULF1                                            |
| potassium ion import (GO:0010107)                 | 0.002906202      | 302.5663219    | ATP4B;ATP4A;KCNE2;KCNJ15;KCNJ16                                                                 |
| protein complex subunit organization (GO:0071822) | 0.005483799      | 238.6254309    | COL1A1;COL1A2;COL12A1;COL5A2;SERPINH1                                                           |
| sodium ion homeostasis (GO:0055078)               | 0.01115878       | 306.095387     | ATP4B;ATP4A;SCNN1G;SCNN1B                                                                       |
| endodermal cell differentiation (GO:0035987)      | 0.022413204      | 229.8623615    | COL12A1;FN1;COL8A1;INHBA                                                                        |
| endoderm formation (GO:0001706)                   | 0.03157087       | 194.9589529    | COL12A1;FN1;COL8A1;INHBA                                                                        |
| terpenoid metabolic process (GO:0016101)          | 0.237396448      | 88.81967526    | AKR1B10;RDH12;ALDH1A1;ADH7                                                                      |
| connective tissue development (GO:0061448)        | 0.325542972      | 130.216984     | HYAL1;RORC;SULF1                                                                                |

**B**

| Term                                                                                                         | Adjusted P-value | Combined Score | Genes                              |
|--------------------------------------------------------------------------------------------------------------|------------------|----------------|------------------------------------|
| ligand-gated cation channel activity (GO:0099094)                                                            | 0.025844673      | 157.8766546    | SCNN1G;KCNE2;SCNN1B;KCNJ15;KCNJ16  |
| oxidoreductase activity, acting on the CH-OH group of donors, NAD or NADP as acceptor (GO:0016616)           | 0.081759539      | 89.09103       | AKR7A3;AKR1B10;HPGD;RDH12;ADH7     |
| aldo-keto reductase (NADP) activity (GO:0004033)                                                             | 0.071609969      | 227.9547374    | ALDH3A1;AKR7A3;AKR1B10             |
| alcohol dehydrogenase (NADP+) activity (GO:0008106)                                                          | 0.053707476      | 227.9547374    | ALDH3A1;AKR1B10;RDH12              |
| inward rectifier potassium channel activity (GO:0005242)                                                     | 0.049921072      | 213.3062095    | KCNE2;KCNJ15;KCNJ16                |
| transferase activity, transferring hexosyl groups (GO:0016758)                                               | 0.04963724       | 73.09416693    | FUT9;HYAL1;B3GNT6;UGT2B15;B4GALNT3 |
| oxidoreductase activity, acting on the aldehyde or oxo group of donors, NAD or NADP as acceptor (GO:0016620) | 0.060657652      | 167.8935025    | ALDH3A1;AKR1B10;ALDH1A1            |
| UDP-glycosyltransferase activity (GO:0008194)                                                                | 0.064044727      | 86.72137596    | HYAL1;B3GNT6;UGT2B15;B4GALNT3      |
| protease binding (GO:0002020)                                                                                | 0.070961134      | 56.22307481    | COL1A1;CST1;COL1A2;FAP;FN1         |
| WW domain binding (GO:0050699)                                                                               | 0.066356657      | 136.5611079    | SCNN1G;SCNN1B;PMEPA1               |

**C**

| Term                                                              | Adjusted P-value | Combined Score | Genes                                                                |
|-------------------------------------------------------------------|------------------|----------------|----------------------------------------------------------------------|
| endoplasmic reticulum lumen (GO:0005788)                          | 3.12E-06         | 83.11304485    | COL1A1;COL1A2;COL12A1;COL5A2;SERPINH1;FN1;SPP1;COL8A1;COL10A1;COL6A3 |
| sodium channel complex (GO:0034706)                               | 0.001382294      | 233.0623223    | SCNN1G;SCNN1B                                                        |
| invadopodium (GO:0071437)                                         | 0.002012448      | 183.138748     | FAP;FSCN1                                                            |
| lysosomal lumen (GO:0043202)                                      | 0.012797079      | 26.91009455    | HYAL1;GIF;BGN                                                        |
| endoplasmic reticulum-Golgi intermediate compartment (GO:0005793) | 0.016689432      | 22.87645773    | SERPINH1;FN1;TMED6                                                   |
| Golgi lumen (GO:0005796)                                          | 0.018118227      | 21.73110062    | BGN;MUC5AC;MUC6                                                      |
| microvillus (GO:0005902)                                          | 0.023517997      | 31.6054726     | GIF;FSCN1                                                            |
| membrane raft (GO:0045121)                                        | 0.029974989      | 15.64984872    | SERPINH1;MAL;SULF1                                                   |
| platelet dense granule membrane (GO:0031088)                      | 0.033428678      | 100.2460508    | RAB27B                                                               |
| FACIT collagen trimer (GO:0005593)                                | 0.033428678      | 100.2460508    | COL12A1                                                              |

**D**

| Term                                         | Adjusted P-value | Combined Score | Genes                                            |
|----------------------------------------------|------------------|----------------|--------------------------------------------------|
| Gastric acid secretion                       | 6.78E-05         | 253.2114663    | ATP4B;ATP4A;KCNE2;CA2;SST;KCNJ15;KCNJ16          |
| Protein digestion and absorption             | 1.19E-04         | 193.7197062    | COL1A1;CPA2;COL1A2;COL12A1;COL5A2;COL10A1;COL6A3 |
| ECM-receptor interaction                     | 7.22E-04         | 153.6671385    | COL1A1;COL1A2;SPP1;FN1;COL6A3;THBS2              |
| Retinol metabolism                           | 0.002962817      | 134.267869     | RDH12;UGT2B15;ALDH1A1;ADH7;CYP2C18               |
| Collecting duct acid secretion               | 0.028662647      | 150.8912952    | ATP4B;ATP4A;CA2                                  |
| Metabolism of xenobiotics by cytochrome P450 | 0.042087242      | 67.98709336    | ALDH3A1;AKR7A3;UGT2B15;ADH7                      |
| Focal adhesion                               | 0.041401124      | 37.18754952    | COL1A1;COL1A2;FN1;SPP1;COL6A3;THBS2              |
| Chemical carcinogenesis                      | 0.046351637      | 58.03718468    | ALDH3A1;UGT2B15;ADH7;CYP2C18                     |
| Drug metabolism                              | 0.112856305      | 37.45994831    | ALDH3A1;UGT2B15;ADH7;FMO5                        |
| Nitrogen metabolism                          | 0.125390116      | 114.6036474    | CA2;CA9                                          |

(A-D) The numbers of enriched genes according to the (A) biological process, (B) molecular function, (C) cellular component categories (D) KEGG pathway analysis.

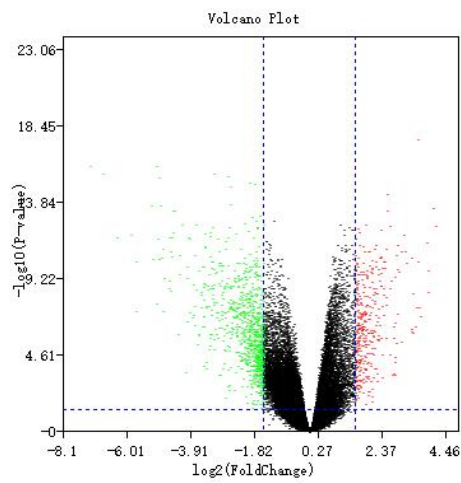

**A GSE13911**

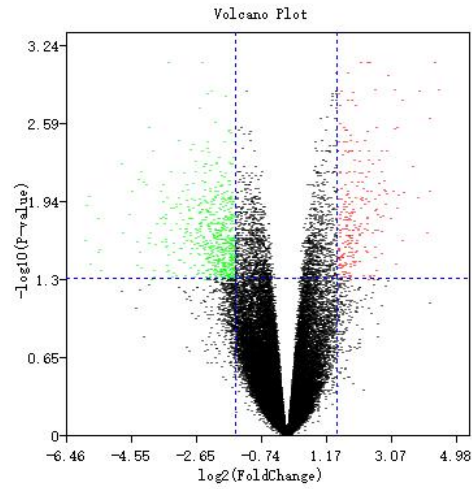

**B GSE19826**

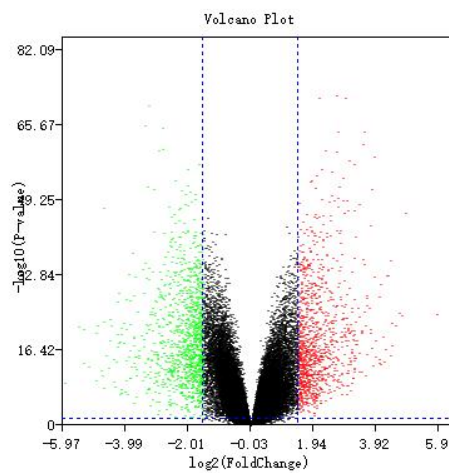

**C GSE54129**

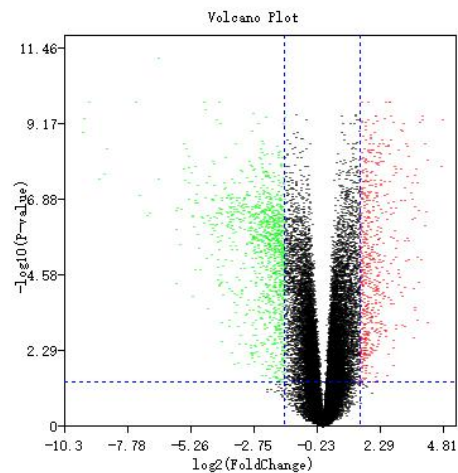

**D GSE65801**

**Supplementary Fig. 1 Analysis of the differentially expression genes between the STAD and non-STAD using Volcano plots**

Red and green points represent up-regulated and down-regulated genes. No differentially expressed genes in black points. (A) DEGs based on GSE13911. (B) DEGs based on GSE519826. (C) DEGs based on GSE54129. (D) DEGs based on GSE65801.
